# Supplementary material for: Quantum chemical and experimental insights for the ionic liquid facilitated thermal dehydrogenation of ethylene diamine bisborane
Source: Royal Society of Chemistry journal article supplement (doi:10.1039/c5ra10625g), 2015-01-01
Supplement: c5ra10625g1.pdf [file c5ra10625g1.pdf]

## **Electronic Supplementary Information**

# **Quantum Chemical and Experimental Insights for the Ionic Liquid Facilitated Thermal Dehydrogenation of Ethylene Diamine Bisborane**

Basudhrity Banerjee, Debashis Kundu, G. Pugazhenthii and Tamal Banerjee\*

Department of Chemical Engineering, Indian Institute of Technology Guwahati, Assam, India

781039

Table S1. COSMO-SAC parameters

| COSMO-SAC parameters                         | Values                                               |
|----------------------------------------------|------------------------------------------------------|
| Effective area ( $a_{eff}$ )                 | 6.32 Å <sup>2</sup>                                  |
| Coefficient of hydrogen bonding ( $C_{hb}$ ) | 75006 (Kcal Å <sup>4</sup> )/(mol e <sup>2</sup> )   |
| Hydrogen bonding cut off ( $\sigma_{hb}$ )   | 0.0084 e/Å <sup>2</sup>                              |
| Permittivity in free space ( $\epsilon_0$ )  | 2.395x10 <sup>-4</sup> (e <sup>2</sup> mol)/(kcal Å) |

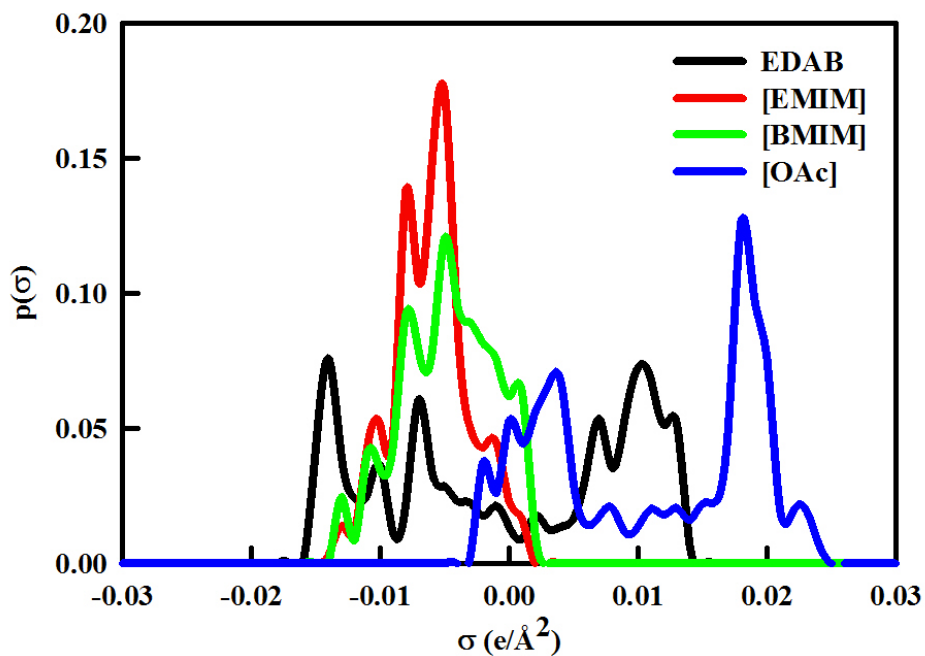

Fig. S1.  $\sigma$ -profile of EDAB, imidazolium cations and acetate anions.

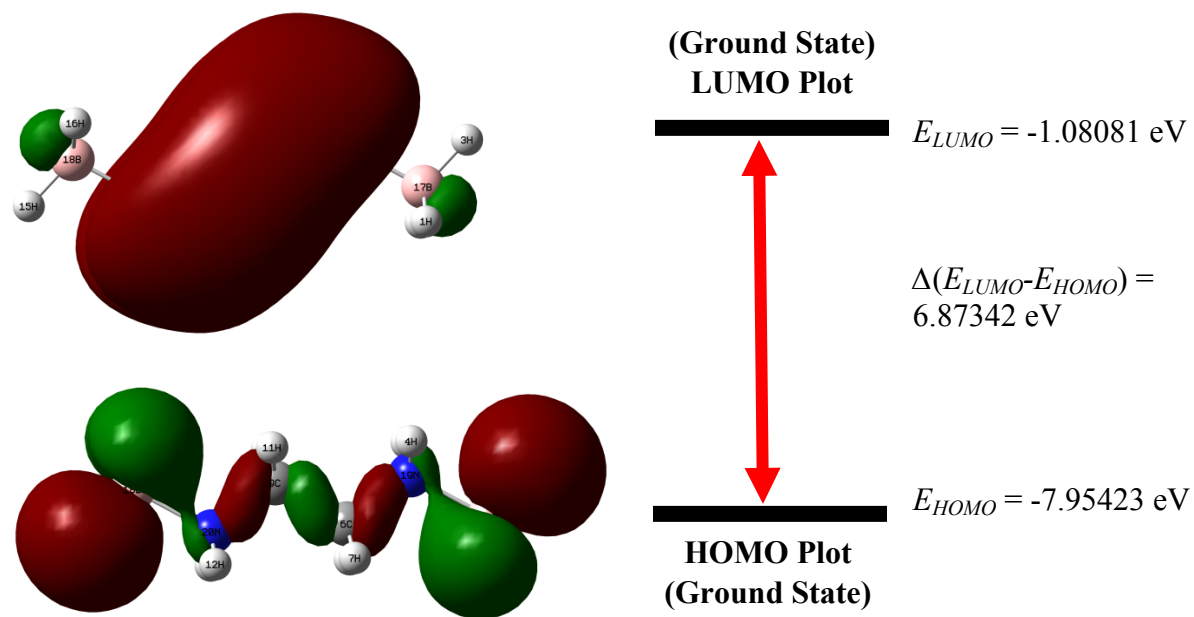

Fig. S2. LUMO-HOMO energy gap of EDAB

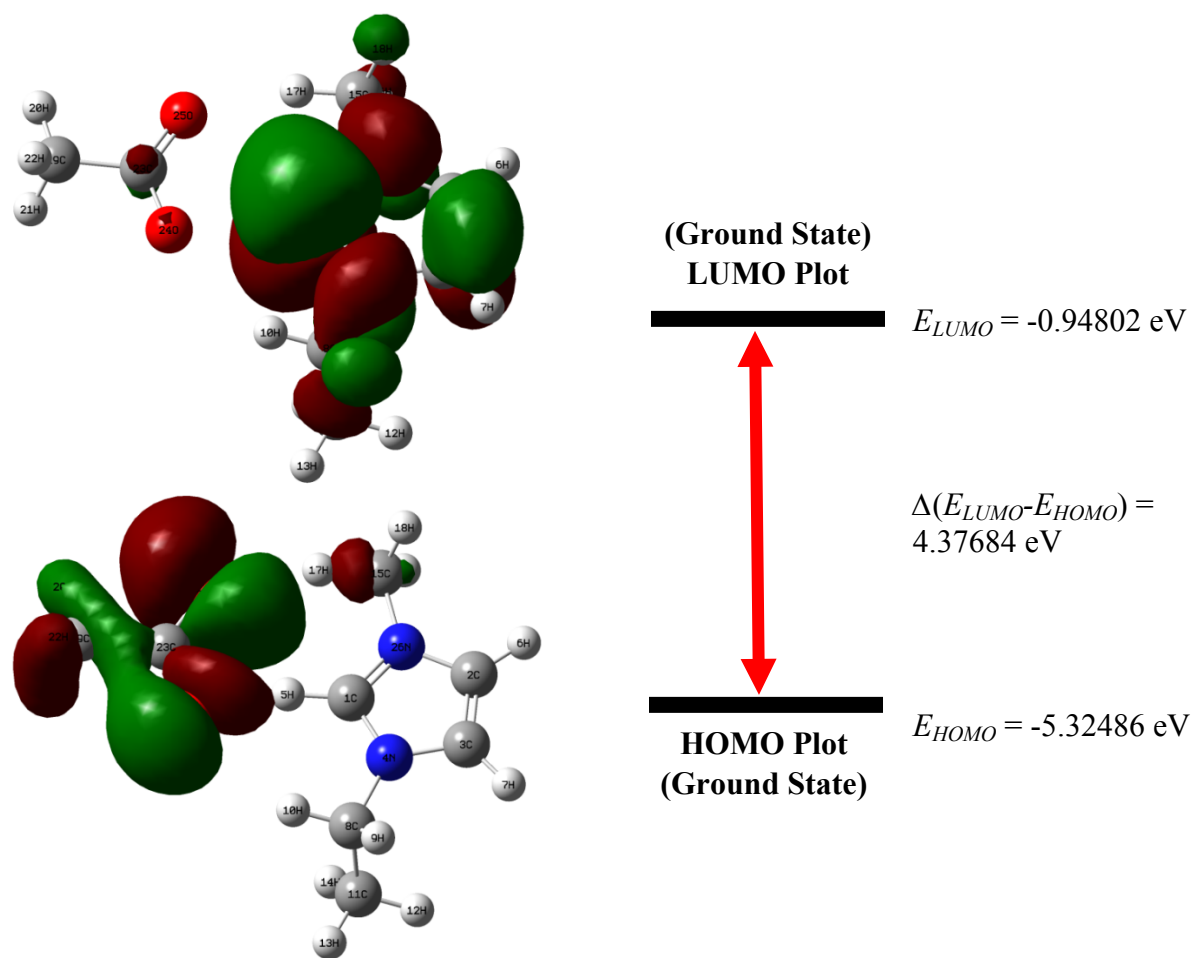

Fig. S3. LUMO-HOMO energy gap of [EMIM][OAc]

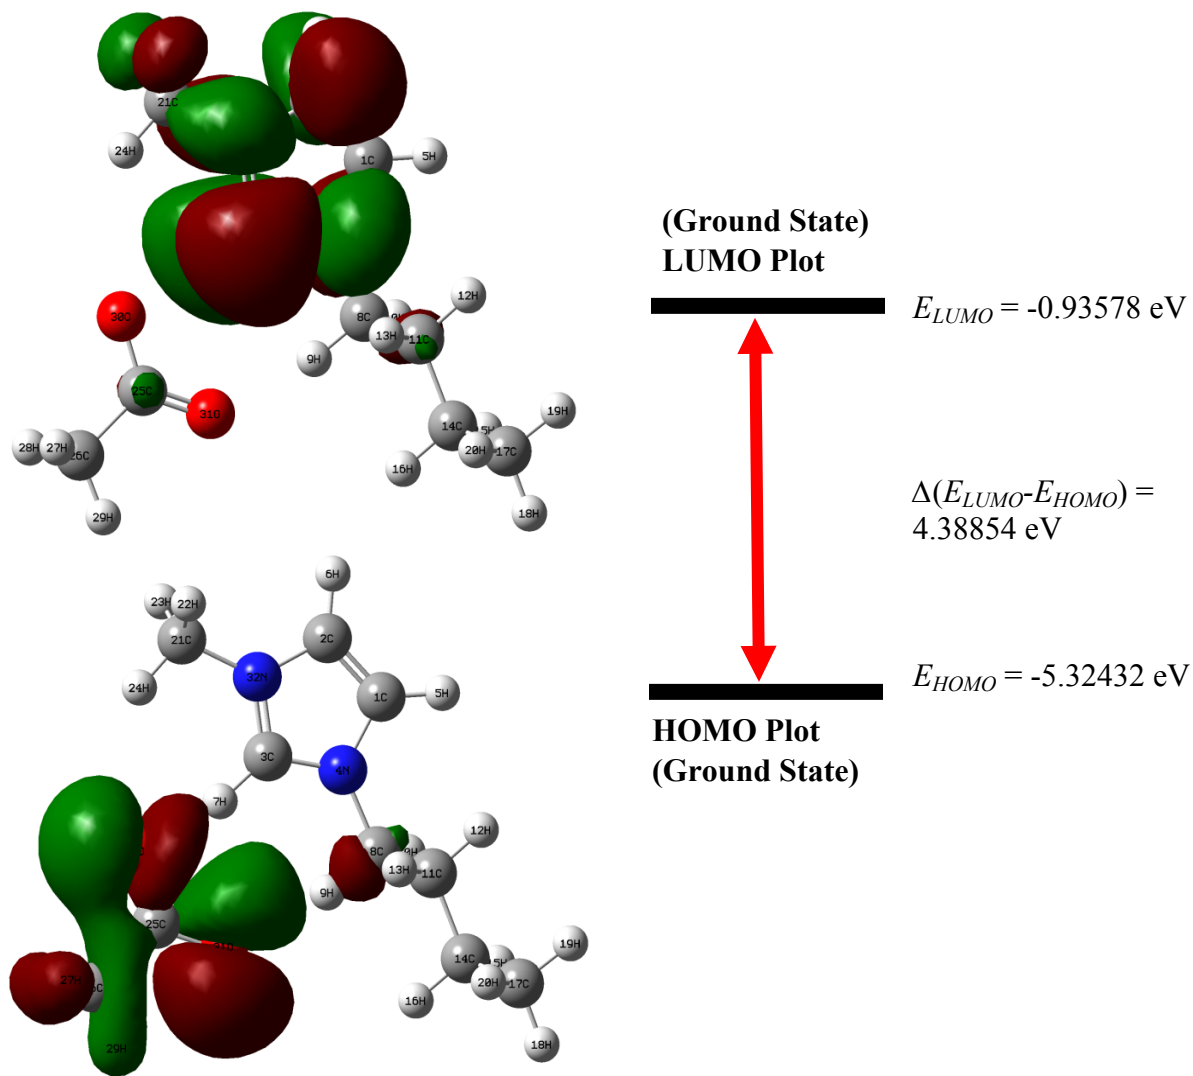

Fig. S4. LUMO-HOMO energy gap of [BMIM][OAc]
